# Supplementary material for: Influence of sumanene modifications with boron and nitrogen atoms to its hydrogen adsorption properties
Source: Royal Society of Chemistry journal article supplement (doi:10.1039/c5cp04497a), 2015-12-22
Supplement: c5cp04497a1.pdf [file c5cp04497a1.pdf]

# Influence of sumanene modifications with boron and nitrogen atoms to its hydrogen adsorption properties

---

Stevan Armaković<sup>1</sup>, Sanja J. Armaković<sup>2,\*</sup>, Svetlana Pelemiš<sup>3</sup>, Dragoljub Mirjanić<sup>4,5</sup>

<sup>1</sup> University of Novi Sad, Faculty of Sciences, Department of Physics, Trg Dositeja Obradovića 4, 21000, Novi Sad, Serbia,

<sup>2</sup> University of Novi Sad, Faculty of Sciences, Department of Chemistry, Biochemistry and Environmental Protection, Trg Dositeja Obradovića 3, 21000, Novi Sad, Serbia,

<sup>3</sup> University of East Sarajevo, Faculty of Technology, Zvornik, Karakaj bb, 75400 Zvornik, Republic of Srpska, Bosnia and Herzegovina

<sup>4</sup> University of Banja Luka, Medical Faculty, 78000 Banja Luka, Republic of Srpska, Bosnia and Herzegovina

<sup>5</sup> Academy of Sciences and Arts of the Republic of Srpska, Trg srpskih vladara 2, 78000 Banja Luka, Republic of Srpska, Bosnia and Herzegovina

**\* Corresponding Author:** Sanja J. Armaković,

Telephone: +381 21 485 2754

E-mail: [sanja.armakovic@dh.uns.ac.rs](mailto:sanja.armakovic@dh.uns.ac.rs)

# Supplementary Information

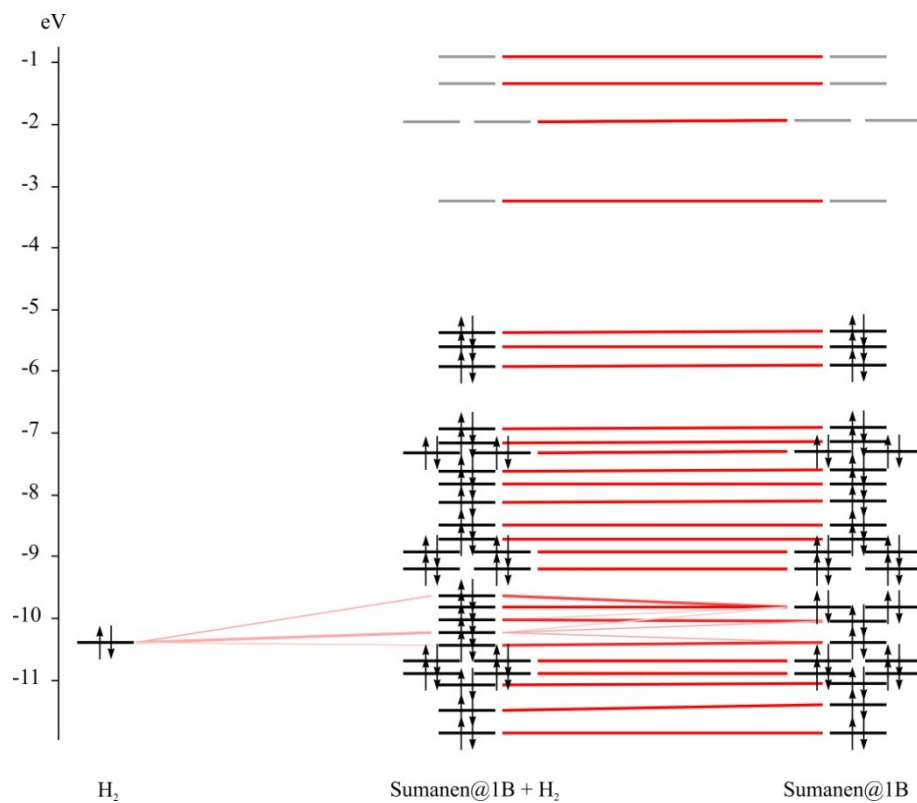

Figure S1. Fragment analysis of system consisting of sumanene derivative modified with one boron atom and  $H_2$

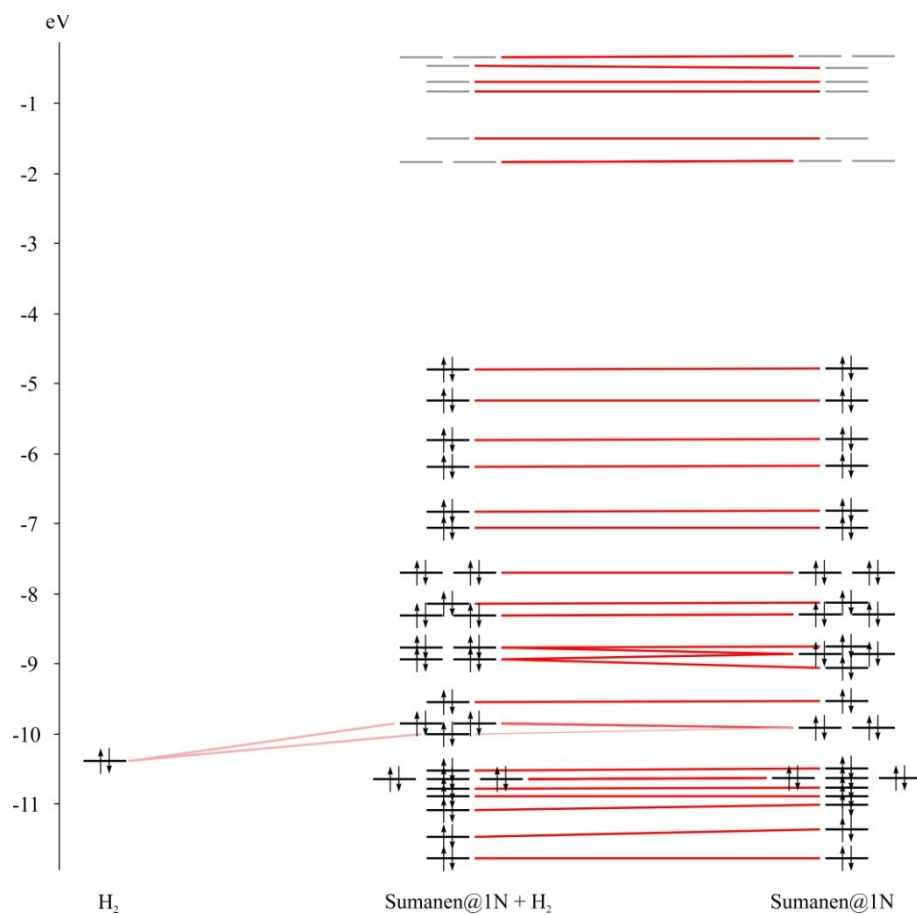

Figure S2. Fragment analysis of system consisting of sumanene derivative modified with one nitrogen atom and H<sub>2</sub>

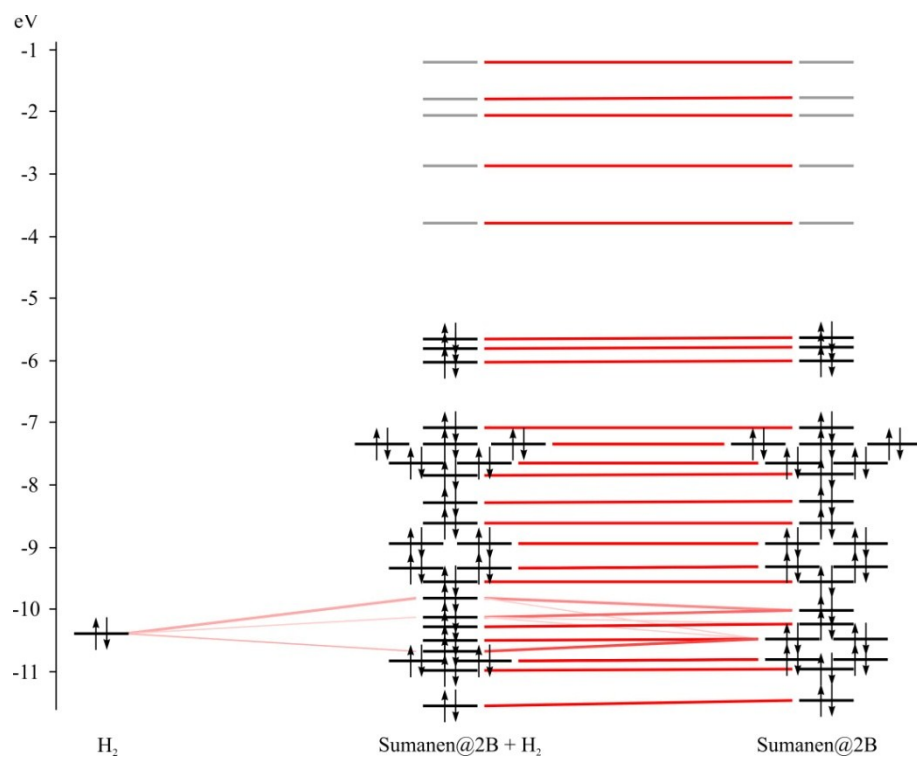

Figure S3. Fragment analysis of system consisting of sumanene derivative modified with two boron atoms and  $H_2$

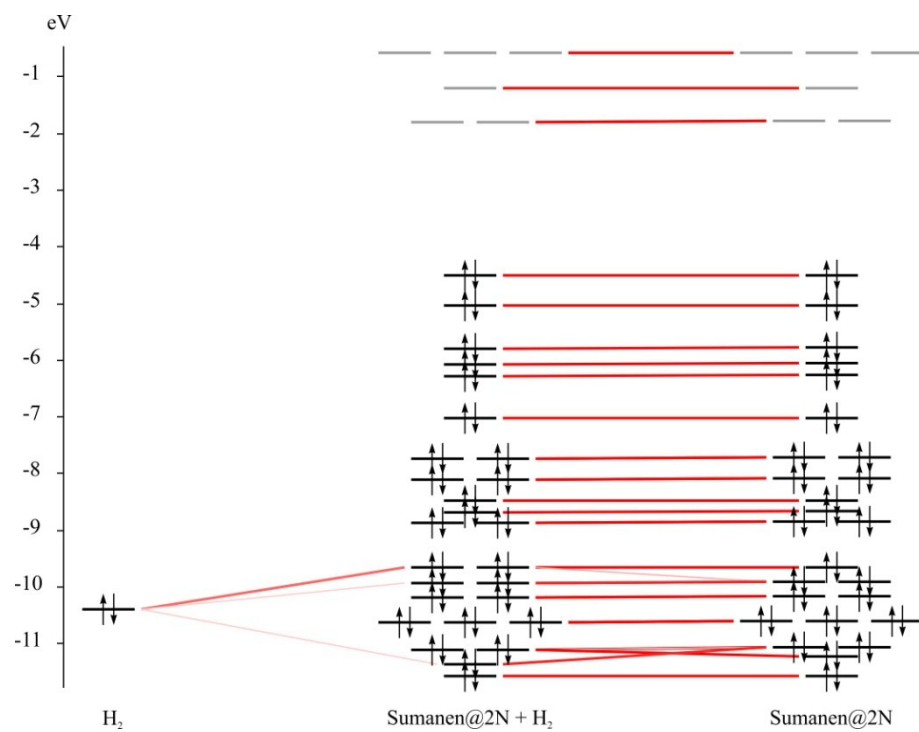

Figure S4. Fragment analysis of system consisting of sumanene derivative modified with two nitrogen atoms and  $H_2$
